# Supplementary material for: Relationship between changes in physical activity and physical and mental health in breast cancer survivors during the COVID-19 pandemic restrictions in Japan
Source: Research Square preprint supplement (doi:10.21203/rs.3.rs-5012436/v1), 2024-10-22
Supplement: Supplementary file 1 [file 25da19f00592102bb1f5a014.xlsx]

## Sheet: Table1 Characteristics and PA
	Table 1. Characteristics of breast cancer survivors (n = 345)
	Variable		Mean±SD	n(%)
	Demographic
		Age (years)	55.7	±8.3
		Sex (female)	345	(100)
		Marital status
		Single	49	(14.2)
		Married	249	(72.2)
		Widowed/divorced	45	(13.0)
		Undisclosed	2	(0.6)
		Family members in household
		Living alone	48	(13.9)
		Two	125	(36.2)
		Three or more	172	(49.9)
		Education attainment
		Partial/full high school completion	132	(38.3)
		Partial/full specialized high-school completion	42	(12.2)
		Partial/full university/ college completion	161	(46.7)
		Undisclosed	4	(1.2)
		Employment
		Full-time	145	(42.0)
		Part-time	88	(25.5)
		Retired/ no profession	106	(30.7)
		Undisclosed	6	(1.7)
	Medical
		Time since diagnosis (months)	71.4	±63.4
		Stage at diagnosis
		Stage 0-I	140	(40.6)
		Stage II	96	(27.8)
		Stage III	23	(6.7)
		Stage IV	11	(3.2)
		Unsure	42	(12.2)
	Treatment status
		Completed treatment	91	(26.4)
		Under treatment	237	(68.7)
		Chemotherapy	24	(7.0)
		Radiotherapy	8	(2.3)
		Hormone therapy	224	(64.9)
	Symptoms
		No	101	(29.3)
		Yes	236	(68.4)
		Fatigue	138	(40.0)
		Stiff joints	92	(26.7)
		Edema	63	(18.3)
		Numbness	53	(15.4)
		Anxiety	52	(15.1)
		Insomnia	52	(15.1)
		Pain	38	(11.0)
		Alopecia	27	(7.8)
		Other symptoms	17	(4.9)
	Physical Status
		Exercise habit: Yes	172	(49.9)
		No (Includes 78 people who stopped exercising)	171	(49.6)
		Reason for stopping exercise (n=78)	78	(45.6)
		No time for exercise	33	(42.3)
		Exercise stopped as infection control measure	26	(33.3)
		No place to exercise due to infection control measure	11	(14.1)
		Physical activity during the COVID-19 pandemic
		PA↓: decreased physical activity	226	(65.5)
		Less active	70	(20.3)
		Somewhat inactive	156	(45.2)
		PA→: physical activity was maintained or improved	119	(34.5)
		No change	107	(31.0)
		More active	12	(3.5)
		Weight change before and during the COVID-19 pandemic
		Weight gain (kg)	3.26522	±2.2
		Weight loss (kg)	3.76	±2.0
		PA, physical activity

## Sheet: Table2 IPAQ
Table 2. Results of the International Physical Activity Questionnaire (IPAQ)
	N=345				IPAQ low group (n=162)			IPAQ moderate-high group (n=183)		p-value
		Mean±SD	n(%)		Mean±SD	n(%)		Mean±SD	n(%)
IPAQ low group		162	(47.0)		-			-
IPAQ moderate group		125	(36.2)		-			-
IPAQ high group		58	(16.8)		-			-
Physical change before and during COVID-19 pandemic
PA was decreased (PA↓)		226	(65.5)	109	109	(67.3)		117	(63.9)	0.513626
PA was maintained or increased (PA→)		119	(34.5)	53	53	(32.7)		66	(36.1)
High-level PA:
Average weekly vigorous-intensity PA		70	(20.3)		8	(5.2)		62	(34.6)	<0.001
Total hours (minute/day)		74.1176	±73.5		45.7143	±42.3		77.377	±75.8	0.118161
Vigorous METs		337.623	±1258.5		7.40741	±54.3		629.945	±1675.8	<0.001
Moderate-level PA:
Average weekly moderate-intensity PA		113	(32.8)		17	(11.0)		96	(54.5)	<0.001
Total hours (minute/day)		111.861	±243.1		45.1053	±48.0		125.073	±263.4	0.00689498
Moderate METs		515.687	±2456.6		19.7284	±79.6		954.732	±3314.9	<0.001
Walk:
Average weekly walking		265	(76.8)		95	(60.1)		170	(93.9)	<0.001
Walking time (min/day)		90.4843	±129.2		33.8313	±19.9		117.982	±149.4	<0.001
Walking METs		1107.94	±2443.8		154.509	±1953		1951.96	±3119.1	<0.001
Total PA (METs-min/wk)		1961.25	±4069.2		181.645	±204.5		3536.64	±5093.7	<0.001
Sedentary time (min/wk)		354.198	±255.5		392.962	±278.2		320.575	±229.5	0.00916964
Chi-square (X2) test and t-test. Analysis was performed excluding "Unknown" answers.
The IPAQ low group includes the IPAQ low PA group. The IPAQ moderate-high group includes both the vigorous and the moderate PA groups.
PA, physical activity; IPAQ, International Physical Activity Questionnaire

## Sheet: Table3 Psychology
Table 3. Outcomes of pysical activity for breast cancer survivors during COVID-19 pandemic
	Number of participants (N=345)			IPAQ Inactive group(n=162)					p-value		IPAQ Middle and High Activity Group(n=183)					p-value
				PA↓(n=109)			PA→(n=53)				PA↓(n=117)			PA→(n=66)
	Mean±SD	n(%)		Mean±SD	n(%)		Mean±SD	n(%)			Mean±SD	n(%)		Mean±SD	n(%)
Infection control（multiple answers）
wearing a mask	340	(98.6)		106	(97.2)		51	(96.2)	0.724363		117	(100.0)		66	(100.0)	-
hand hygiene	316	(91.6)		103	(94.5)		46	(86.8)	0.0904224		109	(93.2)		58	(87.9)	0.224338
vaccination	296	(85.8)		95	(87.2)		46	(86.8)	0.948472		105	(89.7)		50	(75.8)	0.0116124
avoiding crowds	288	(83.5)		91	(83.5)		41	(78.8)	0.473732		132	(88.0)		53	(80.3)	0.156749
refraining from going out	184	(53.3)		66	(60.6)		24	(45.3)	0.0665362		73	(62.4)		21	(31.8)	<0.001
Recognized vulnerabilities to COVID-19
Yes	62	(18.0)		29	(27.4)		8	(15.4)	<0.001		22	(19.3)		3	(4.5)	0.00581509
No	276	(80.0)		77	(72.6)		44	(84.6)			92	(80.7)		63	(95.5)
No response	7	( 2.0)
FCV-19S (1-35)	16.93	±5.2		17.82	±5.6		16.02	±4.9	0.038		17.54	±5.1		15.09	±4.7	0.001
COVID-19 scares me more than anything else. (1-5)	3.32362	±1.0		3.39815	±1.0		3.22642	±1.1	0.345474		3.41026	±1.0		3.12308	±1.0	0.007
I'm not comfortable thinking about COVID-19. (1-5)	2.38462	±0.9		2.5283	±1.0		2.22642	±0.8	0.0431693		2.50435	±0.9		2.0625	±0.9	0.00211124
My hands are sweating when I think of COVID-19. (1-5)	1.67544	±0.8		1.83333	±1.0		1.67925	±0.8	0.296975		1.64957	±0.7		1.45312	±0.8	0.0934431
I'm afraid I'm going to die from COVID-19. (1-5)	3.35503	±1.3		3.42991	±1.3		3.29412	±1.3	0.534634		3.44828	±1.1		3.10938	±1.4	0.0728288
I get nervous or anxious when I see news or talk about COVID-19
on social media. (1-5)	2.59824	±1.1		2.7037	±1.2		2.44231	±1.2	0.190801		2.75862	±1.0		2.26154	±1.1	0.00252671
I can't sleep because I'm worried about COVID-19 infection. (1-5)	1.66172	±0.8		1.80374	±0.8		1.51923	±0.6	0.0196964		1.72174	±0.8		1.42857	±0.7	0.0105788
The thought of COVID-19 infection makes my heart skip a beat. (1-5)	2.07625	±1.1		2.22222	±1.1		1.86538	±1.0	0.0473273		2.18966	±1.1		1.8	±1.0	0.0133787
PHQ-9
Mean PHQ-9 score (0-27)	3.98718	±4.3		5.02778	±5.0		2.35294	±2.8	<0.001		4.25439	±4.0		3.06061	±4.1	0.0619404
Depression symptoms (%)
None（0 to 4）	226	(65.5)		60	(56.1)		42	(82.0)	0.004		71	(62.3)		53	(80.3)	0.042
Mild（5 to 9）	79	(22.9)		33	(30.8)		8	(16.0)			29	(25.4)		9	(13.6)
Moderate（10-27）	33	(9.5)		14	(13.1)		1	(2.0)			14	(12.3)		4	(6.0)
EORTC
Global health/QOL (0-100)	64.9067	±21.6		58.9506	±21.4		72.7987	±18.1	<0.001		64.2241	±22.2		69.5707	±20.9	0.106546
Functional scales (0-100)
Physical functioning	90.7731	±11.2		88.642	±12.3		92.6531	± 9.9	0.0322153		90.0295	±12.1		94.2564	± 7.4	0.0111743
Role functioning	90.2819	±17.0		85.514	±20.1		94.1176	±12.4	0.00558678		90.4971	±17.0		94.8718	±12.5	0.0717097
Emotional functioning	86.6231	±16.8		83.6478	±18.5		89.5425	±13.3	0.0244645		85.7246	±16.8		90.5128	±15.7	0.0618932
Cognitive functioning	84.0947	±17.9		82.716	±18.2		85.9477	±15.8	0.254097		82.4561	±18.9		88.2051	±16.6	0.035973
Social functioning	91.0297	±17.1		87.963	±19.2		91.8301	±19.3	0.239467		91.1504	±15.6		95.3846	±13.0	0.066187
Symptom scales (0-100)
Fatigue	27.5237	±22.6		33.8477	±23.7		23.3115	±19.7	0.00384305		27.8261	±23.2		20.3125	±19.2	0.0210598
Nausea and vomiting	1.4497	± 5.7		1.86916	± 5.8		0.653595	± 3.3	0.162829		1.47826	± 6.1		1.28205	± 6.1	0.836104
Pain	12.803	±19.8		18.0818	±22.2		7.66667	±17.6	0.00410335		11.9883	±20.0		9.48718	±14.4	0.377668
Dyspnea	8.19469	±16.0		11.1111	±18.2		5.88235	±12.8	0.0672585		7.82609	±16.1		6.15385	±14.3	0.473201
Insomnia	21.3284	±28.0		25.3086	±28.8		14	±23.4	0.00997875		22.6087	±29.5		18.4615	±26.4	0.333288
Appetite loss	6.95	±15.1		8.89815	±17.4		3.90196	±12.7	0.06848		8.41228	±15.8		3.55385	±10.3	0.0273487
Constipation	17.6538	±32.7		24.3827	±39.9		13.0719	±20.1	0.0186643		16.2319	±35.4		12.3077	±19.2	0.336142
Diarrhea	7.12094	±15.2		9.5679	±19.4		6.53595	±13.4	0.314217		5.21739	±12.2		7.17949	±13.8	0.341477
Financial difficulties	12.3787	±24.0		14.1975	±24.2		11.7647	±27.3	0.588603		11.5942	±22.5		10.7692	±24.4	0.823057
Life satisfaction (1-10)	6.97376	± 1.9		6.5	± 2.1		7.45283	± 1.6	0.00339442		6.78448	± 1.9		7.69697	± 1.7	0.000960518
Satisfaction with life changes before and during COVID-19 pandemic
Very poor	162	(47.0)		70	(64.2)		14	(26.4)	<0.001		66	(57.4)		12	(18.2)	<0.001
Neither poor nor good	159	(46.1)		34	(31.2)		33	(62.3)			42	(36.5)		50	(75.8)
Good	20	(5.8)		3	(2.8)		6	(11.3)			7	(6.1)		4	(6.1)
Non-response	4	(1.6)
PA↓ means the group with decreased PA. PA→ means the group with maintained or improved PA
The change in quality of life before and after the COVID-19 pandemic was rated on a 10-point scale from 1 ”very dissatisfied” to 10 ”very satisfied.”
t-test and χ2 test were used. The analysis excluded non-responses.

## Sheet: Table4  Logistics
Table 4. Factors associated with changes in physical activity during the COVID-19 pandemic						n=345
		Partial regression coefficient	Standard error	p-value	OR	（95% CI）
	PHQ-9	-0.171286	0.0554518	0.00200886	0.844	(0.759–0.938)
	Exercise stopped as infection control	-1.76838	0.769313	0.0215248	0.170609	(0.038–0.771)
Binomial logistic regression analysis (forward stepwise)
The dependent variable was the change in physical activity (PA) (1: PA↓, 2: PA→)
The independent variables were the items with significant differences in the univariate analysis.
	PHQ-9 score (0-27. The higher the score, the more severe the depressive symptoms）
	Stopped exercising to prevent infection（0. No, 1. Yes）
Significant probability of Hosmer-Lemeshow χ2 statistic: 2.434, p=0.932, accuracy rate: 69.0%.
OR, odds ratio; CI, confidence interval; PHQ-9, Patient Health Questionnaire-9

## Sheet: Table5 Exercise support needs 
Table 5. Exercise support needs of breast cancer survivors before and during the COVID-19 pandemic
	Total (n=345)		PA↓ (n=226)		PA→ (n=119)		p-value
	n	(%)	n	(%)	n	(%)
Individualized support by nurses	170	(49.3)	109	(48.2)	61	(51.3)	0.0488932
Individualized support by physical therapist	208	(60.3)	133	(58.8)	75	(63.0)	0.0087661
Individualized support by physician	177	(51.3)	115	(50.9)	62	(52.1)	0.0563021
Individualized support by medical team	204	(59.1)	135	(59.7)	69	(58.0)	0.0364315
Follow-up by telephone	141	(40.9)	94	(41.6)	47	(39.5)	0.0429327
Follow-up via e-mail	147	(42.6)	105	(46.5)	42	(35.3)	0.0123976
Providing information through brochures	244	(70.7)	168	(74.3)	76	(63.9)	0.085978
Providing information via video	222	(64.3)	147	(65.0)	75	(63.0)	0.259073
Providing information on our website	237	(68.7)	161	(71.2)	76	(63.9)	0.150748
Providing information at lectures	182	(52.8)	121	(53.5)	61	(51.3)	0.147427
Exercise class	229	(66.4)	148	(65.5)	81	(68.1)	0.467229
Home-based exercise	298	(86.4)	200	(88.5)	98	(82.4)	0.331717
Exercise support needs was a 7-point scale from 1 ("Not necessary at all") to 7 ("Very necessary").
（Percentage of responses scored between 5 and 7）
χ2 test was performed.
